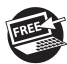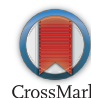

# Erratum

## **Cardiometabolic Risk in a Rural Ugandan Population. *Diabetes Care* 2013;36:e143**

DOI: 10.2337/dc14-er04

In the article cited above, a minor error was made in the calculation of the Framingham Risk Score (FRS). The sentences “The mean value of FRS was 3.30 (SD 6.5), with 3.5% having high FRS. Only 8–28%, depending on the MetS definition, had both MetS and high FRS. By contrast to MetS, high FRS was more common among men (5.8% [95% CI 5.1–6.5]) than women (1.9% [95% CI 1.5–2.3]).” should have read, “The mean value of FRS was 2.98 (SD 6.0), with 2.7% having high FRS. Only 5–14%, depending on the MetS definition, had both MetS and high FRS. By contrast to MetS, high FRS was more common among men (4.6% [95% CI 4.4–5.7]) than women (1.2% [95% CI 0.7–1.4]).” This correction does not change the overall conclusions of the article.

*Georgina A.V. Murphy, Gershim Asiki,  
Elizabeth H. Young, Janet Seeley,  
Rebecca N. Nsubuga, Manjinder S. Sandhu,  
and Anatoli Kamali*
